# Supplementary material
Source: PubMed Central journal article supplement (PMC3958015)
Supplement: IAI.01070-13_zii999090557so2.pdf [file IAI.01070-13_zii999090557so2.pdf]

**Figure S2**

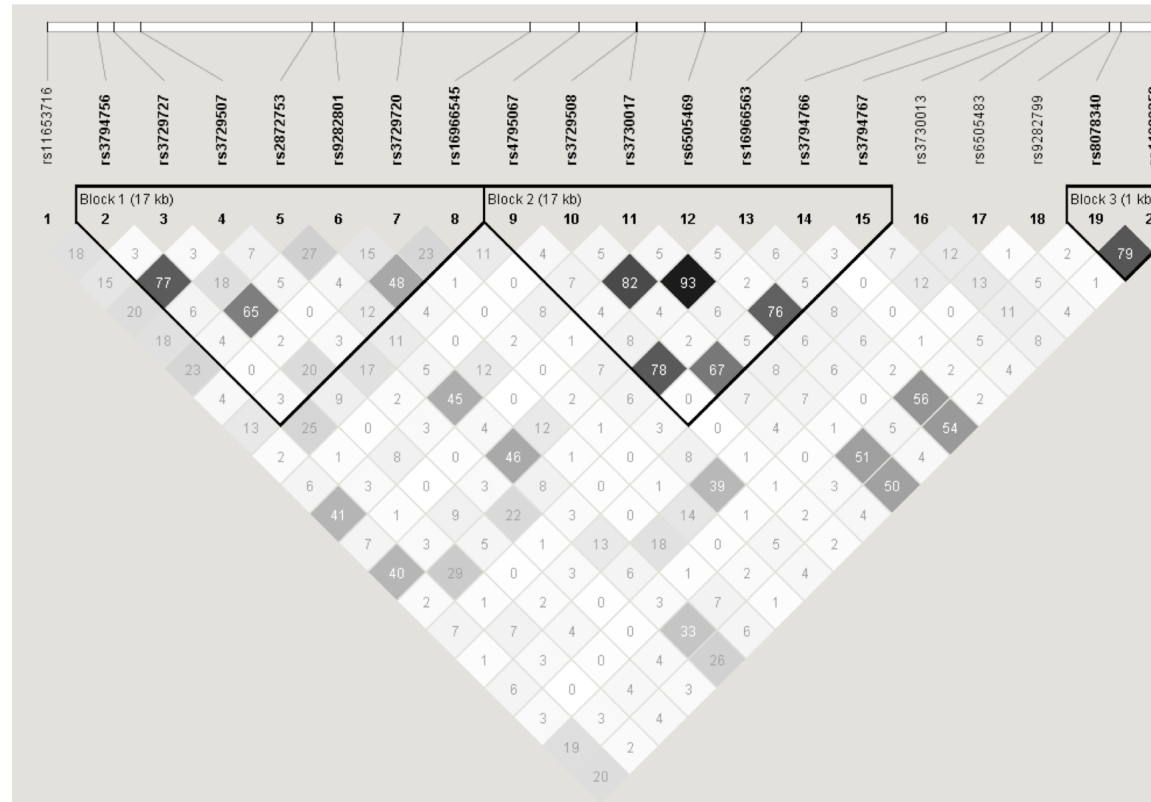

**Figure S2.** LD map for the tested SNPs in the Angolan population obtained with Haploview 4.2 (values represent pairwise  $r^2$ ).
